# Supplementary material for: Alkaloids with Cardiovascular Effects from the Marine-Derived Fungus Penicillium expansum Y32
Source: MDPI journal article supplement (doi:10.3390/md13106489), 2015-10-22
Supplement: s1 [file s1]

Supplementary Materials

List of Supplementary Materials

**The 18S rRNA sequences data of *Penicillium expansum* Y32**…………………………………S2

**Figure S1.** 1H-NMR spectrum of camemberol I (**1**) in CDCl3………………………………………S3

**Figure S2.** 13C-NMR spectrum of camemberol I (**1**) in CDCl3……………………………………S4

**Figure S3.** DEPT spectrum of camemberol I (**1**) in CDCl3…………………………………………S5

**Figure S4.** HSQC spectrum of camemberol I (**1**) in CDCl3………………………………………S6

**Figure S5.** 1H-1H COSY spectrum of camemberol I (**1**) in CDCl3…………………………………S7

**Figure S6.** HMBC spectrum of camemberol I (**1**) in CDCl3………………………………………S8

**Figure S7.** NOESY spectrum of camemberol I (**1**) in CDCl3………………………………………S9

**Figure S8.** 1H-NMR spectrum of fumiquinazoline Q (**4**) in CDCl3………………………………S10

**Figure S9.** 13C-NMR spectrum of fumiquinazoline Q (**4**) in CDCl3………………………………S11

**Figure S10.** DEPT spectrum of fumiquinazoline Q (**4**) in CDCl3…………………………………S12

**Figure S11.** HSQC spectrum of fumiquinazoline Q (**4**) in CDCl3…………………………………S13

**Figure S12.** 1H-1H COSY spectrum of fumiquinazoline Q (**4**) in CDCl3…………………………S14

**Figure S13.** HMBC spectrum of fumiquinazoline Q (**4**) in CDCl3………………………………S15

**Figure S14.** NOESY spectrum of fumiquinazoline Q (**4**) in CDCl3………………………………S16

**Figure S15.** 1H-NMR spectrum of protuboxepin E (**8**) in DMSO-*d*6………………………………S17

**Figure S16.** 13C-NMR spectrum of protuboxepin E (**8**) in DMSO-*d*6……………………………S18

**Figure S17.** DEPT spectrum of protuboxepin E (**8**) in DMSO-*d*6…………………………………S19

**Figure S18.** HSQC spectrum of protuboxepin E (**8**) in DMSO-*d*6………………………………S20

**Figure S19.** 1H-1H COSY spectrum of protuboxepin E (**8**) in DMSO-*d*6…………………………S21

**Figure S20.** HMBC spectrum of protuboxepin E (**8**) in DMSO-*d*6……………………...……S22

**Figure S21.** NOESY spectrum of protuboxepin E (**8**) in DMSO-*d*6………………………………S23

**Figure S22.** 1H-NMR spectrum of (*S*)-**1** MTPA ester (**1a**) in CDCl3………………………………S24

**Figure S23.** 1H-1H COSY spectrum of (*S*)-**1** MTPA ester (**1a**) in CDCl3…………………………S25

**Figure S24.** 1H-NMR spectrum of (*R*)-**1** MTPA ester (**1b**) in CDCl3………………………………S26

**Figure S25.** 1H-1H COSY spectrum of (*R*)-**1** MTPA ester (**1b**) in CDCl3…………………………S27

**Figure S26.** Marfey’s method applying for compound **4**…………………………………………S29

**Figure S27.** Marfey’s method applying for compound **5**…………………………………………S30

**Figure S28.** Marfey’s method applying for compound **8**…………………………………………S31

**Table S1.** 1H (600 MHz) and 13C (150 MHz) NMR data for compounds **2**–**3** in CDCl3 ………S32

The 18S rRNA Sequences Data of *Penicillium expansum* Y32

AACTTGTACTGTGAAACTGCGAATGGCTCATTAAATCAGTTATCGTTTATTTGATAGTACCTTACTACATGGATACCTGTGGTAATTCTAGAGCTAATACATGCTAAAAACCCCGACTTCAGGAAGGGGTGTATTTATTAGATAAAAAACCAACGCCCTTCGGGGCTCCTTGGTGAATCATAATAACTTAACGAATCGCATGGCCTTGCGCCGGCGATGGTTCATTCAAATTTCTGCCCTATCAACTTTCGATGGTAGGATAGTGGCCTACCATGGTGGCAACGGGTAACGGGGAATTAGGGTTCGATTCCGGAGAGGGAGCCTGAGAAACGGCTACCACATCCAAGGAAGGCAGCAGGCGCGCAAATTACCCAATCCCGATACGGGGAGGTAGTGACAATAAATACTGATACGGGGCTCTTTTGGGTCTCGTAATTGGAATGAGAACAATTTAAATCCCTTAACGAGGAACAATTGGAGGGCAAGTCTGGTGCCAGCAGCCGCGGTAATTCCAGCTCCAATAGCGTATATTAAAGTTGTTGCAGTTAAAAAGCTCGTAGTTGAACCTTGGGTCTGGCTGGCCGGTCCGCCTCACCGCGAGTACTGGTCCGGCTGGACCTTTCCTTCTGGGGAACCTCATGGCCTTCACTGGCTGTGGGGGGAACCAGGACTTTTACTGTGAAAAAATTAGAGTGTTCAAAGCAGGCCTTTGCTCGAATACATTAGCATGGAATAATAGAATAGGACGTGTGGTTCTATTTTGTTGGTTTCTAGGACCGCCGTAATGATTAATAGGGATAGTCGGGGGCGTCAGTATTCAGCTGTCAGAGGTGAAATTCTTGGATTTGCTGAAGACTAACTACTGCGAAAGCATTCGCCAAGGATGTTTTCATTAATCAGGGAACGAAAGTTAGGGGATCGAAGACGATCAGATACCGTCGTAGTCTTAACCATAAACTATGCCGACTAGGGATCGGACGGGATTCTATAATGACCCGTTCGGCACCTTACGAGAAATCAAAGTTTTTGGGTTCTGGGGGGAGTATGGTCGCAAGGCTGAAACTTAAAGAAATTGACGGAAGGGCACCACAAGGCGTGGAGCCTGCGGCTTAATTTGACTCAACACGGGGAAACTCACCAGGTCCAGACAAAATAAGGATTGACAGATTGAGAGCTCTTTCTTGATCTTTTGGATGGTGGTGCATGGCCGTTCTTAGTTGGTGGAGTGATTTGTCTGCTTAATTGCGATAACGAACGAGACCTCGGCCCTTAAATAGCCCGGTCCGCATTTGCGGGCCGCTGGCTTCTTAAGGGGACTATCGGCTCAAGCCGATGGAAGTGCGCGGCAATAACAGGTCTGTGATGCCCTTAGATGTTCTGGGCCGCACGCGCGCTACACTGACAGGGCCAGCGAGTACATCACCTTAACCGAGAGGTTTGGGTAATCTTGTTAAACCCTGTCGTGCTGGGGATAGAGCATTGCAATTATTGCTCTTCAACGAGGAATGCCTAGTAGGCACGAGTCATCAGCTCGTGCCGATTACGTCCCTGCCCTTTGTACACACCGCCCGTCGCTACTACCGATTGAATGGCTCAGTGAGGCCTTGGGATTGGCTTAGGAGGGTTGGCAACGACCCCCCAGAGCCGAAAACTTGGTCAAACTCGGTCA


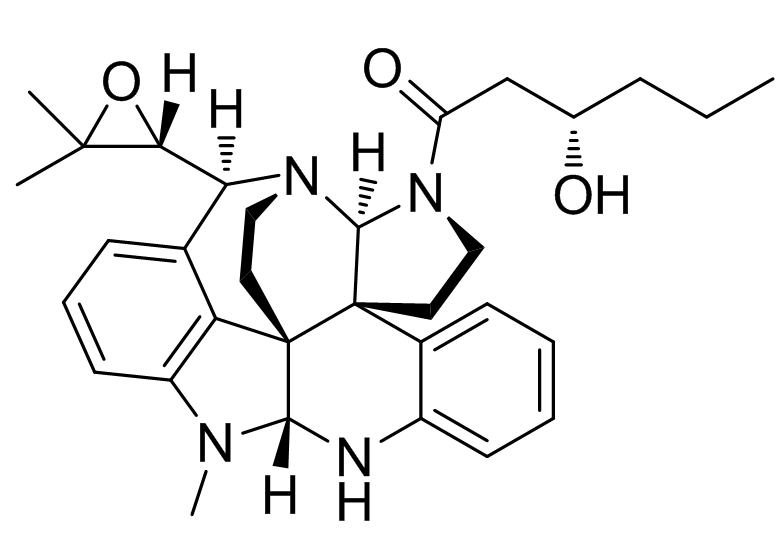


**Figure S1.** 1H-NMR spectrum of camemberol I (**1**) in CDCl3.


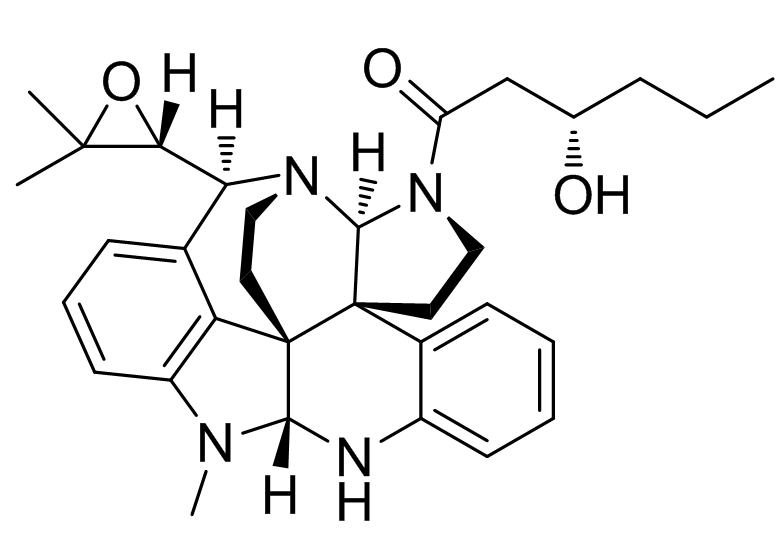


**Figure S2.** 13C-NMR spectrum of camemberol I (**1**) in CDCl3.


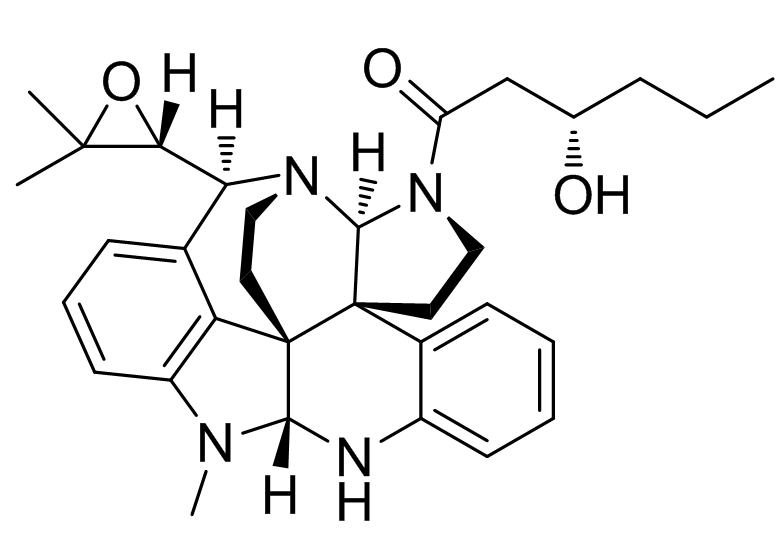


**Figure S3.** DEPT spectrum of camemberol I (**1**) in CDCl3.


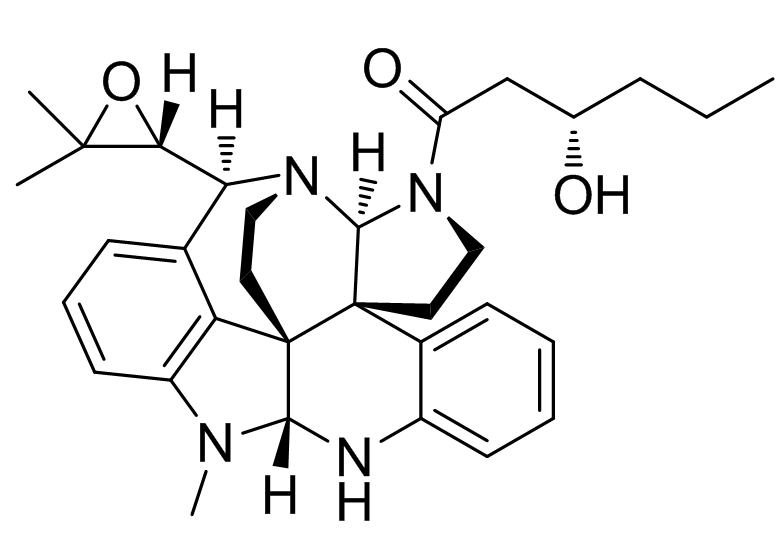


**Figure S4.** HSQC spectrum of camemberol I (**1**) in CDCl3.


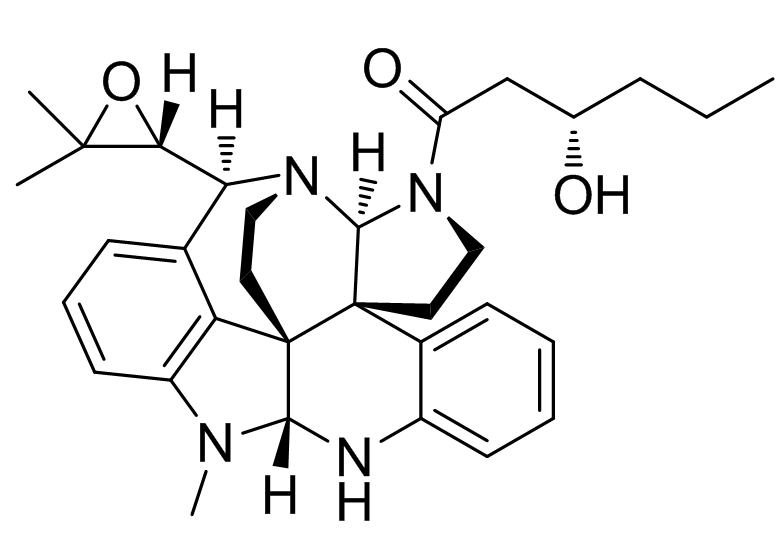


**Figure S5.** 1H-1H COSY spectrum of camemberol I (**1**) in CDCl3.


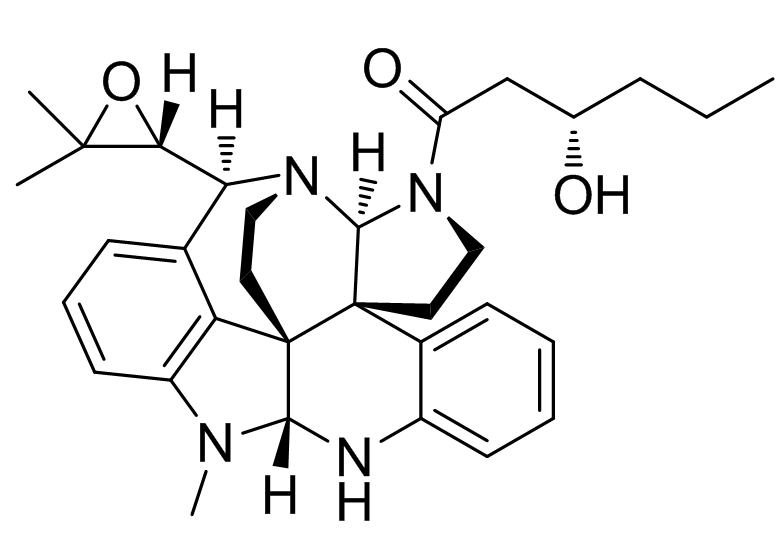


**Figure S6.** HMBC spectrum of camemberol I (**1**) in CDCl3.


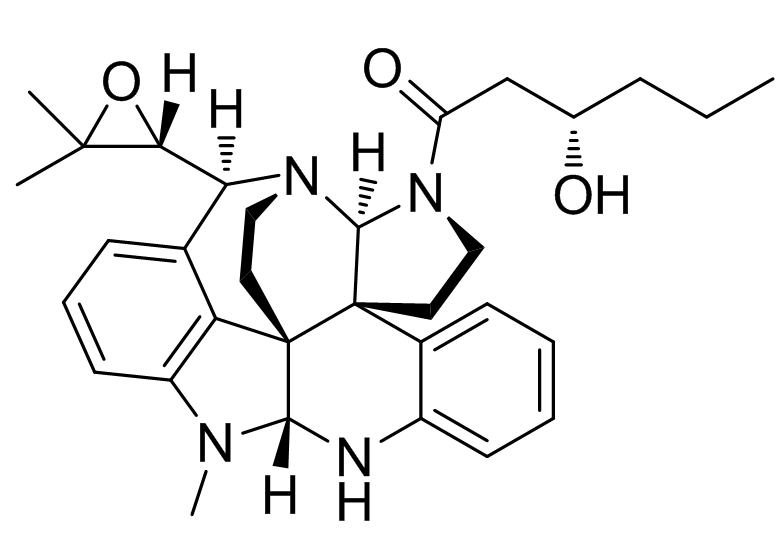


**Figure S7.** NOESY spectrum of camemberol I (**1**) in CDCl3.


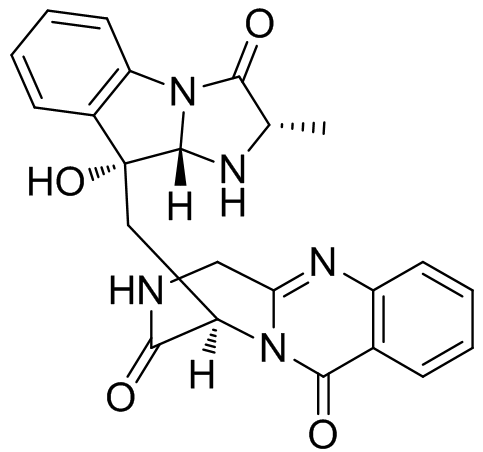


**Figure S8.** 1H-NMR spectrum of fumiquinazoline Q (**4**) in CDCl3.


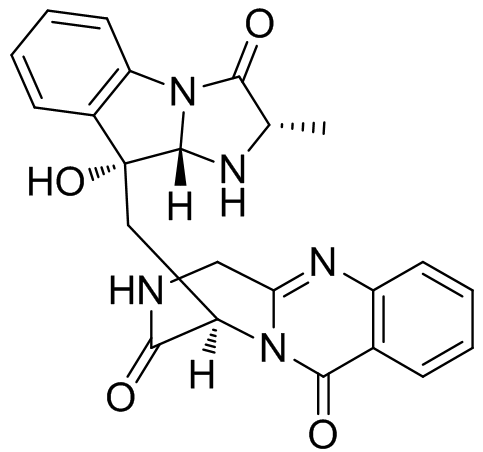


**Figure S9.** 13C-NMR spectrum of fumiquinazoline Q (**4**) in CDCl3.


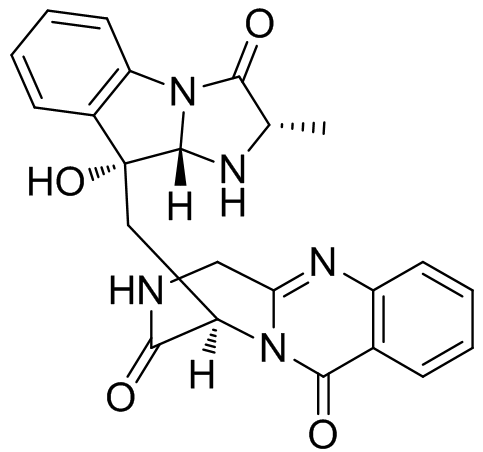


**Figure S10.** DEPT spectrum of fumiquinazoline Q (**4**) in CDCl3.


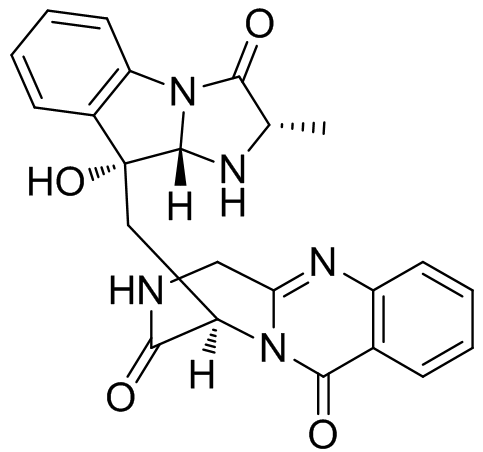


**Figure S11.** HSQC spectrum of fumiquinazoline Q (**4**) in CDCl3.


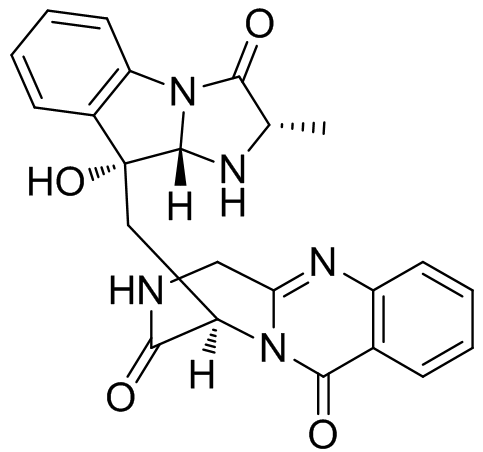


**Figure S12.** 1H-1H COSY spectrum of fumiquinazoline Q (**4**) in CDCl3.


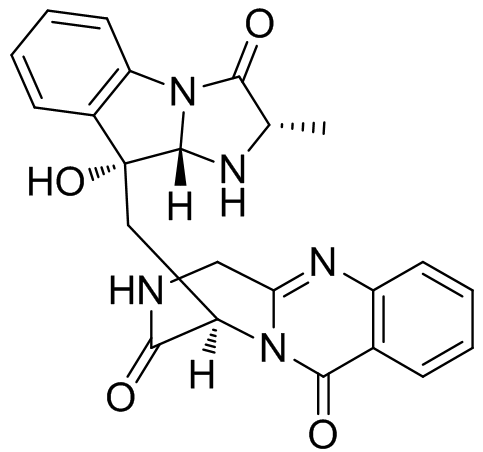


**Figure S13.** HMBC spectrum of fumiquinazoline Q (**4**) in CDCl3.


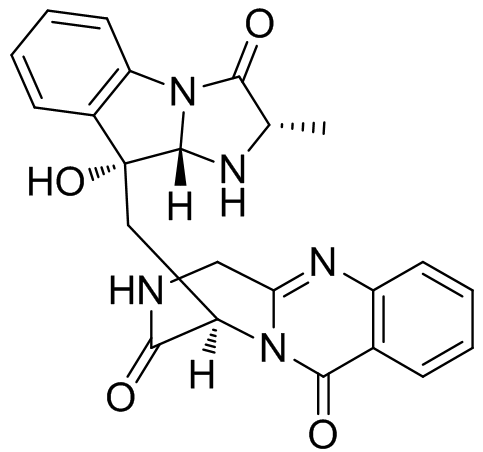


**Figure S14.** NOESY spectrum of fumiquinazoline Q (**4**) in CDCl3.


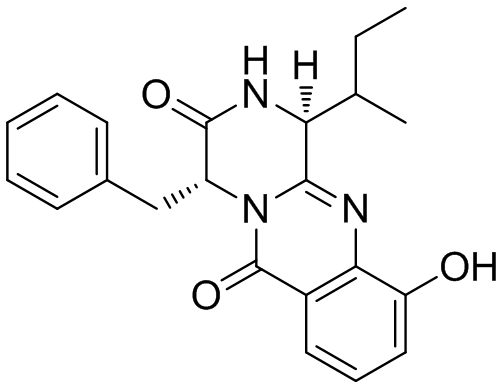


**Figure S15.** 1H-NMR spectrum of protuboxepin E (**8**) in DMSO-*d*6.


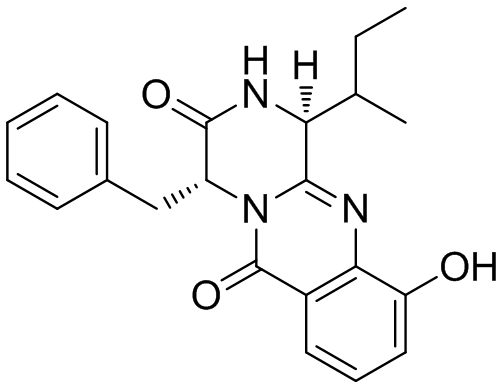


**Figure S16.** 13C-NMR spectrum of protuboxepin E (**8**) in DMSO-*d*6.


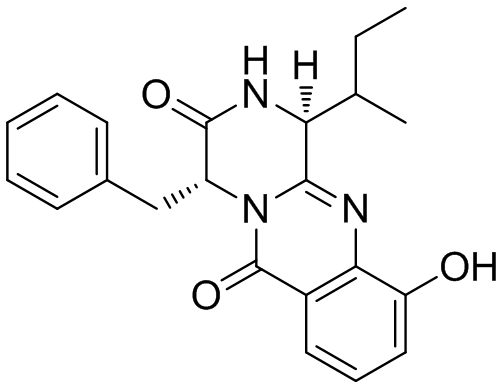


**Figure S17.** DEPT spectrum of protuboxepin E (**8**) in DMSO-*d*6.


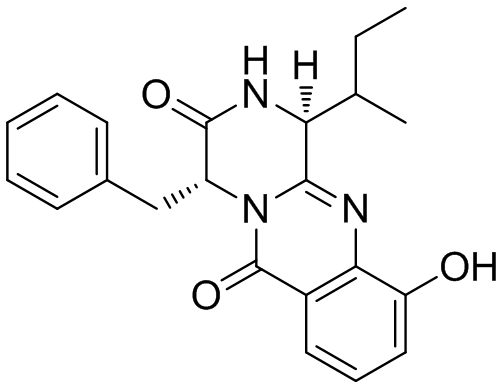


**Figure S18.** HSQC spectrum of protuboxepin E (**8**) in DMSO-*d*6.


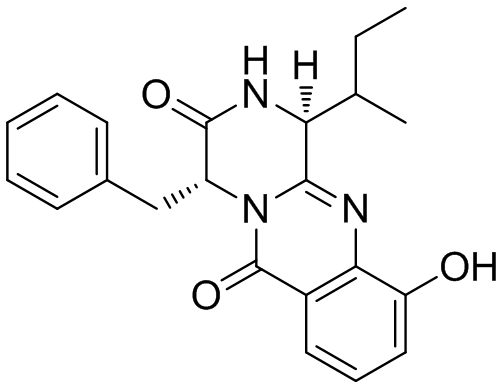


**Figure S19.** 1H-1H COSY spectrum of protuboxepin E (**8**) in DMSO-*d*6.


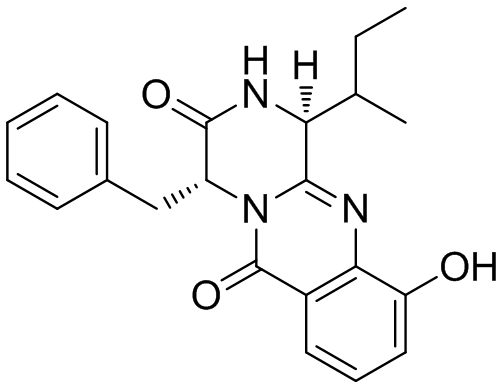


**Figure S20.** HMBC spectrum of protuboxepin E (**8**) in DMSO-*d*6.


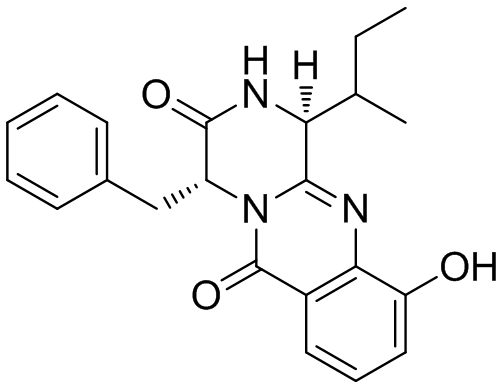


**Figure S21.** NOESY spectrum of protuboxepin E (**8**) in DMSO-*d*6.

**Figure S22.** 1H-NMR spectrum of (*S*)-**1** MTPA ester (**1a**) in CDCl3.

**Figure S23.** 1H-1H COSY spectrum of (*S*)-**1** MTPA ester (**1a**) in CDCl3.

**Figure S24.** 1H-NMR spectrum of (*R*)-**1** MTPA ester (**1b**) in CDCl3.

**Figure S25.** 1H-1H COSY spectrum of (*R*)-**1** MTPA ester (**1b**) in CDCl3.

| **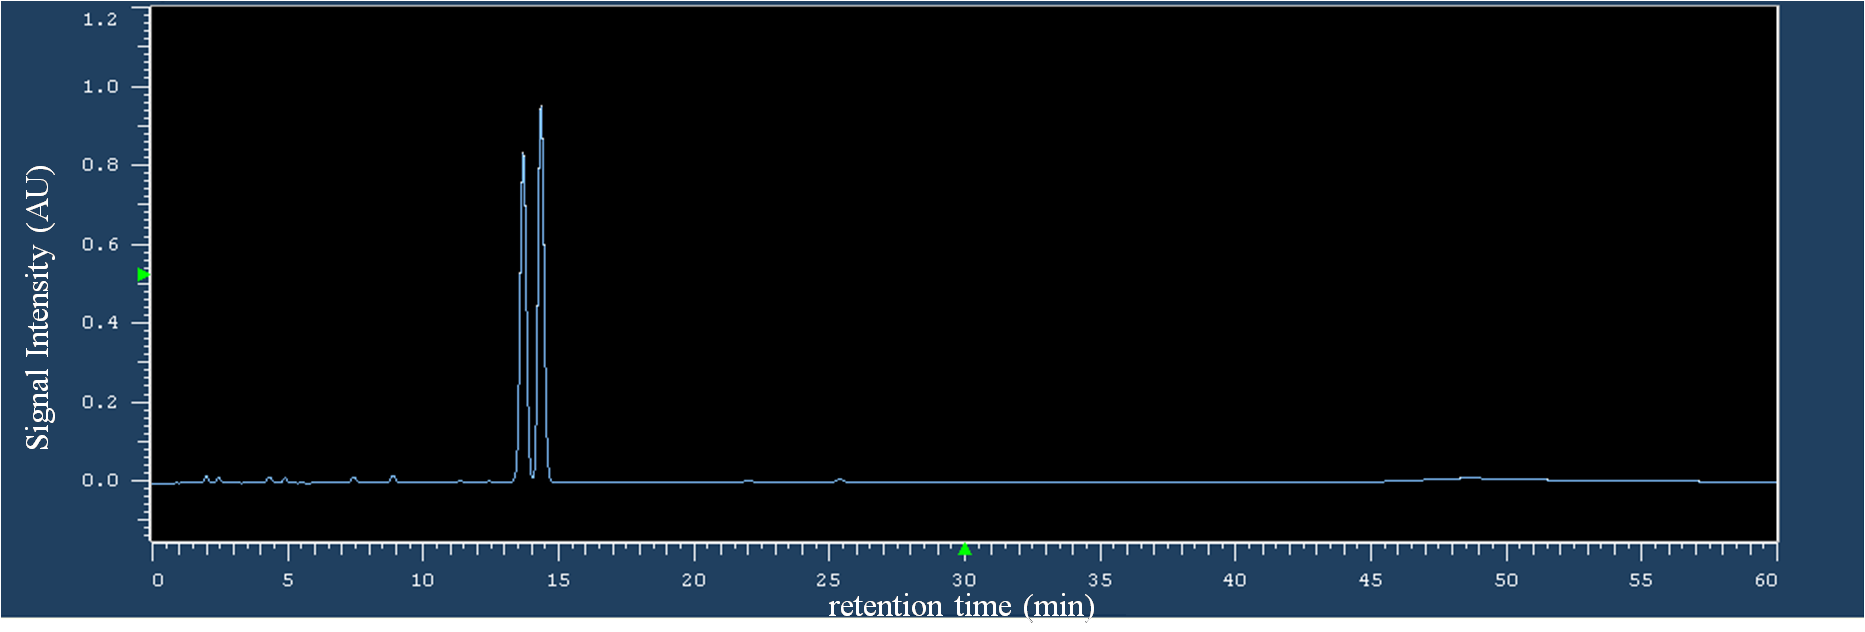** |
| --- |
| (**a**) |
| 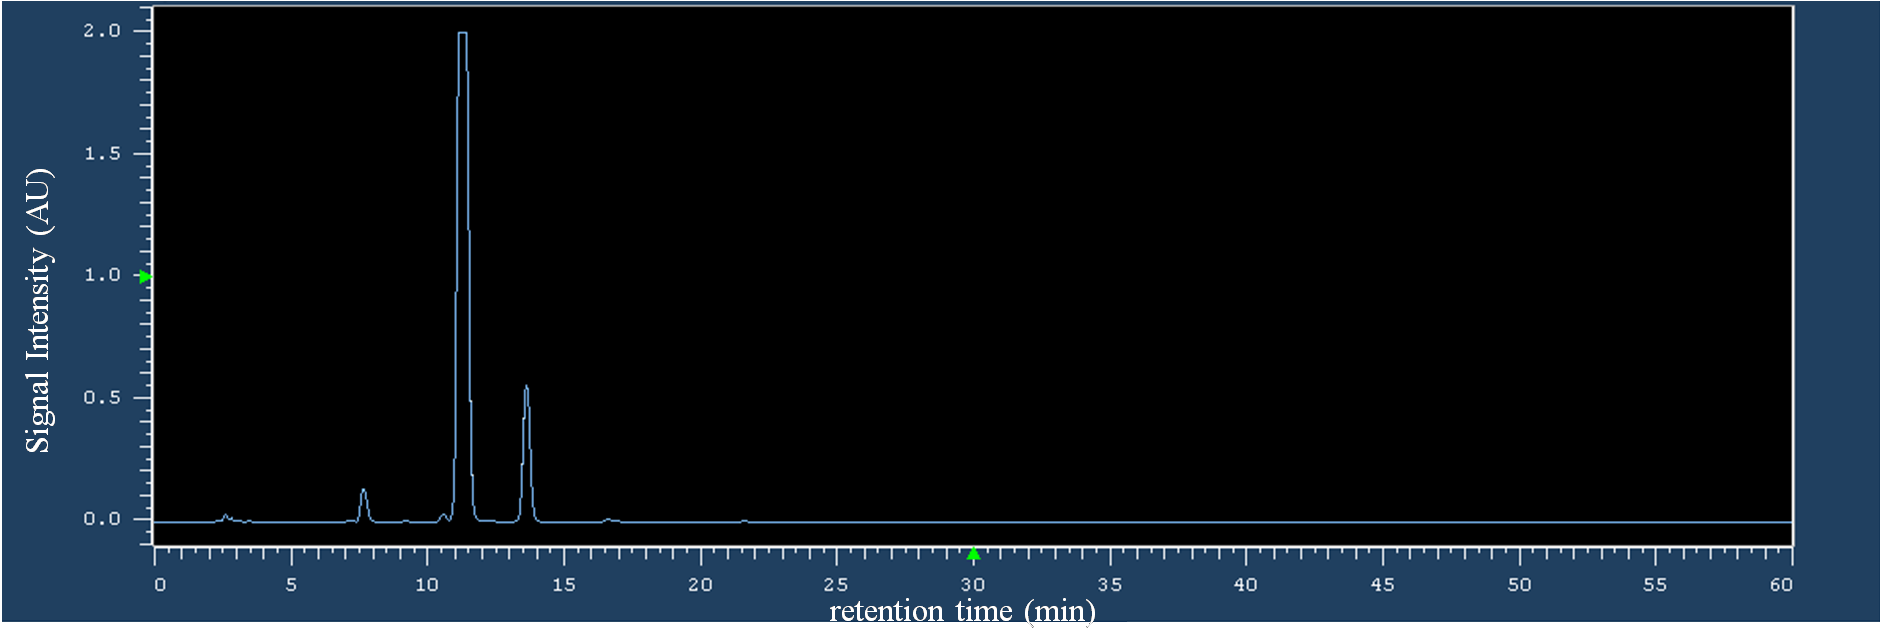 |
| (**b**) |
| 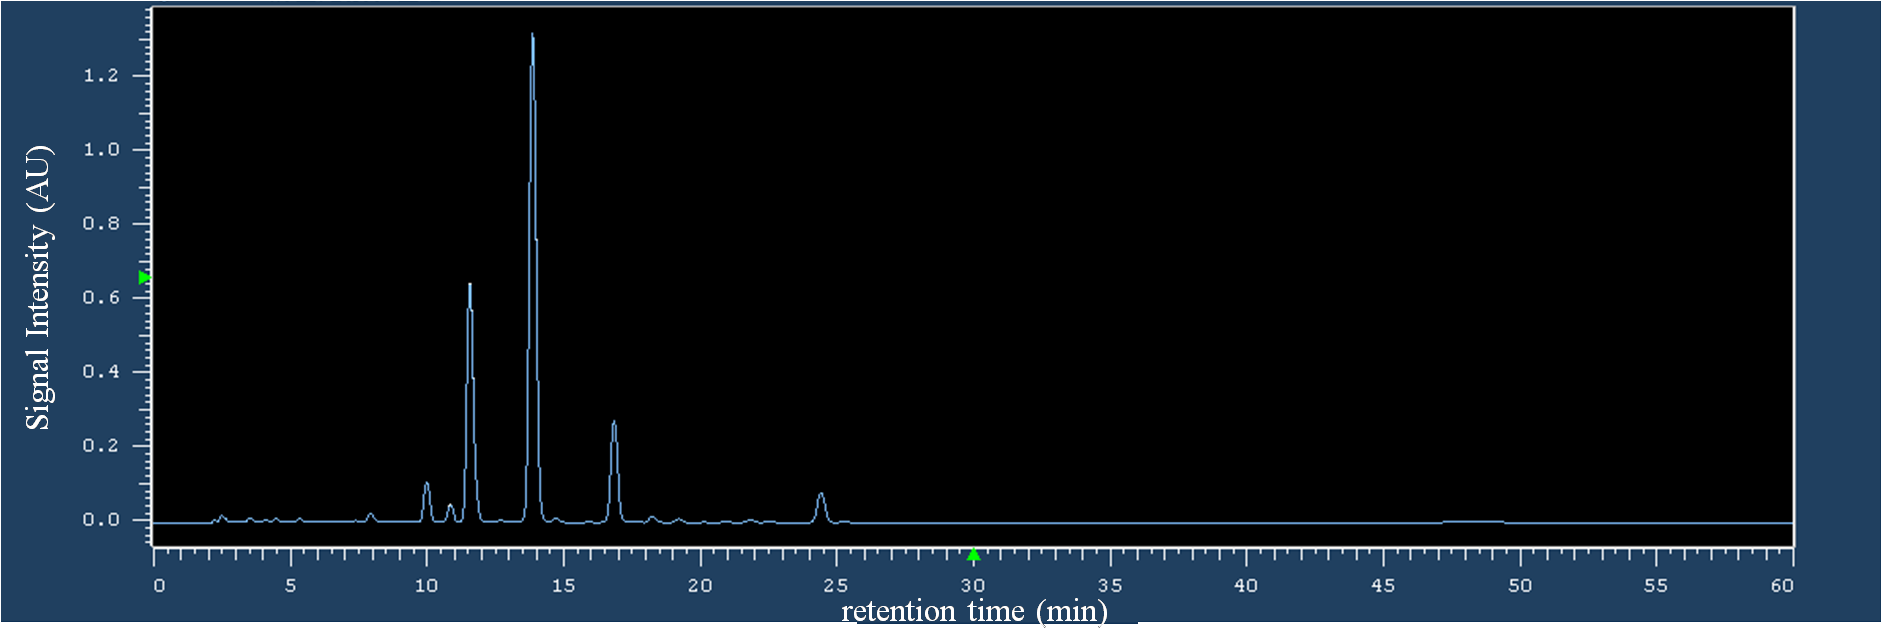 |
| (**c**) |

**Figure S26.** *Cont.*

| 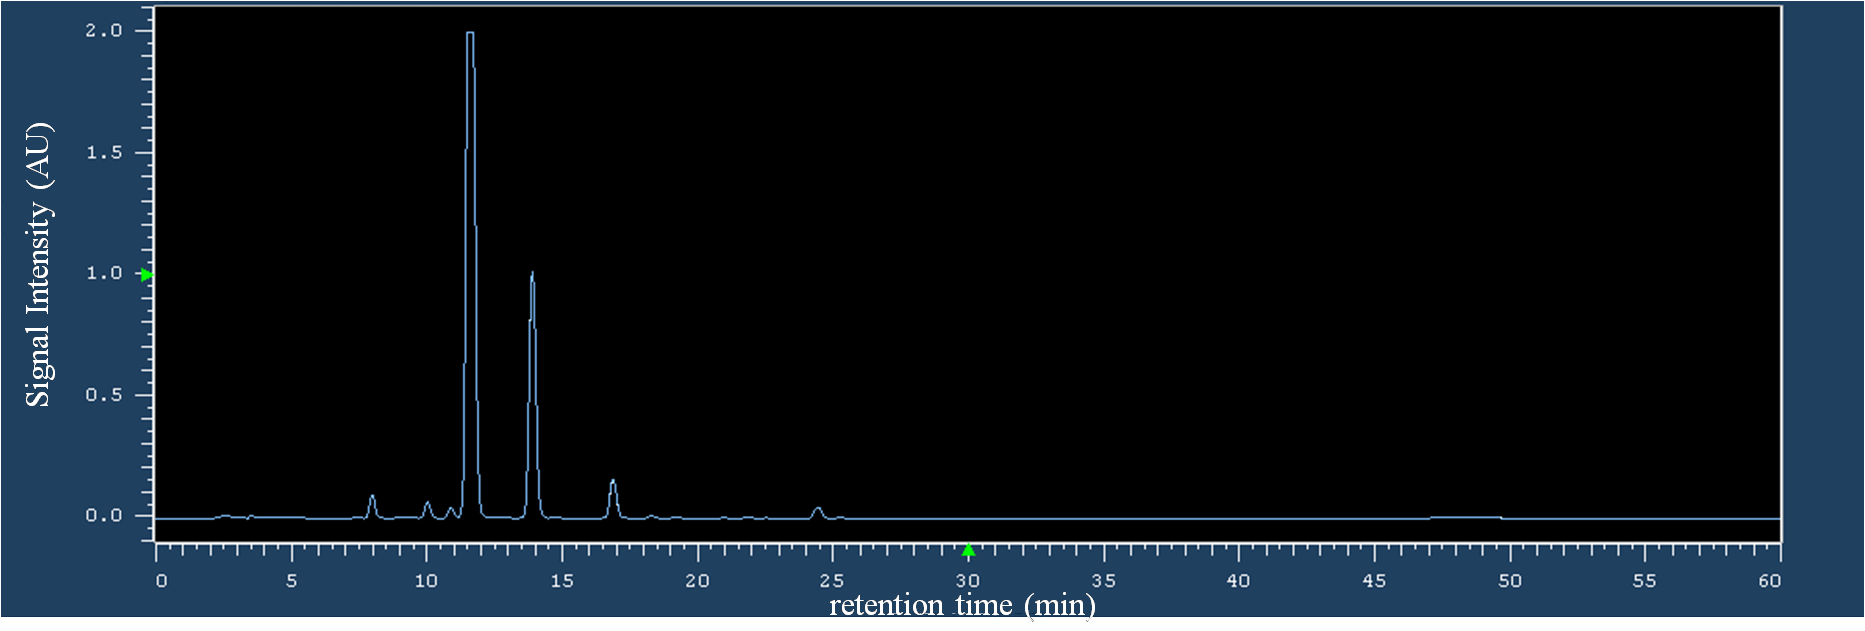 |
| --- |
| (**d**) |

**Figure S26.** Marfey’s method applying for compound **4** (ODS column: Solvent A: water
+ 0.2% TFA; Solvent B: MeCN; linear gradient: 0 min 25% B, 40 min 60% B, 45 min 100% B; Flow rate: 1 mL/min; Teperature, 30 °C; UV detection at 340 nm; FDAA,
13.6 min). (**a**) Co-injection of FDAA derivatives of standard D-Ala by ODS column;
(**b**) Co-injection of FDAA derivatives of standard L-Ala by ODS column; (**c**) FDAA derivatives of the acid hydrolysate of **4** by ODS column; (**d**) Co-injection of FDAA derivatives of the acid hydrolysate of **4** with standard L-Ala by ODS column.

| 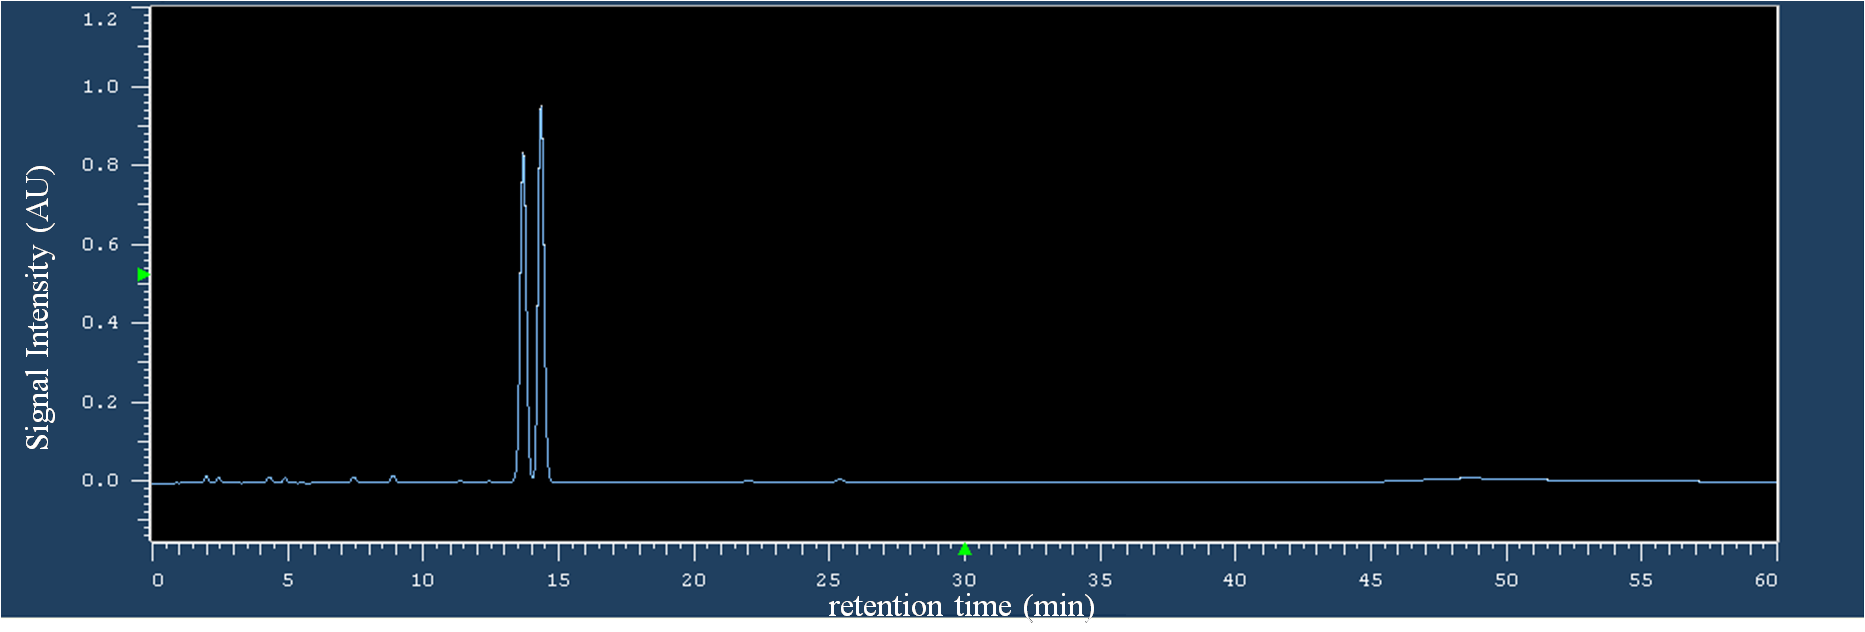 |
| --- |
| (**a**) |
| 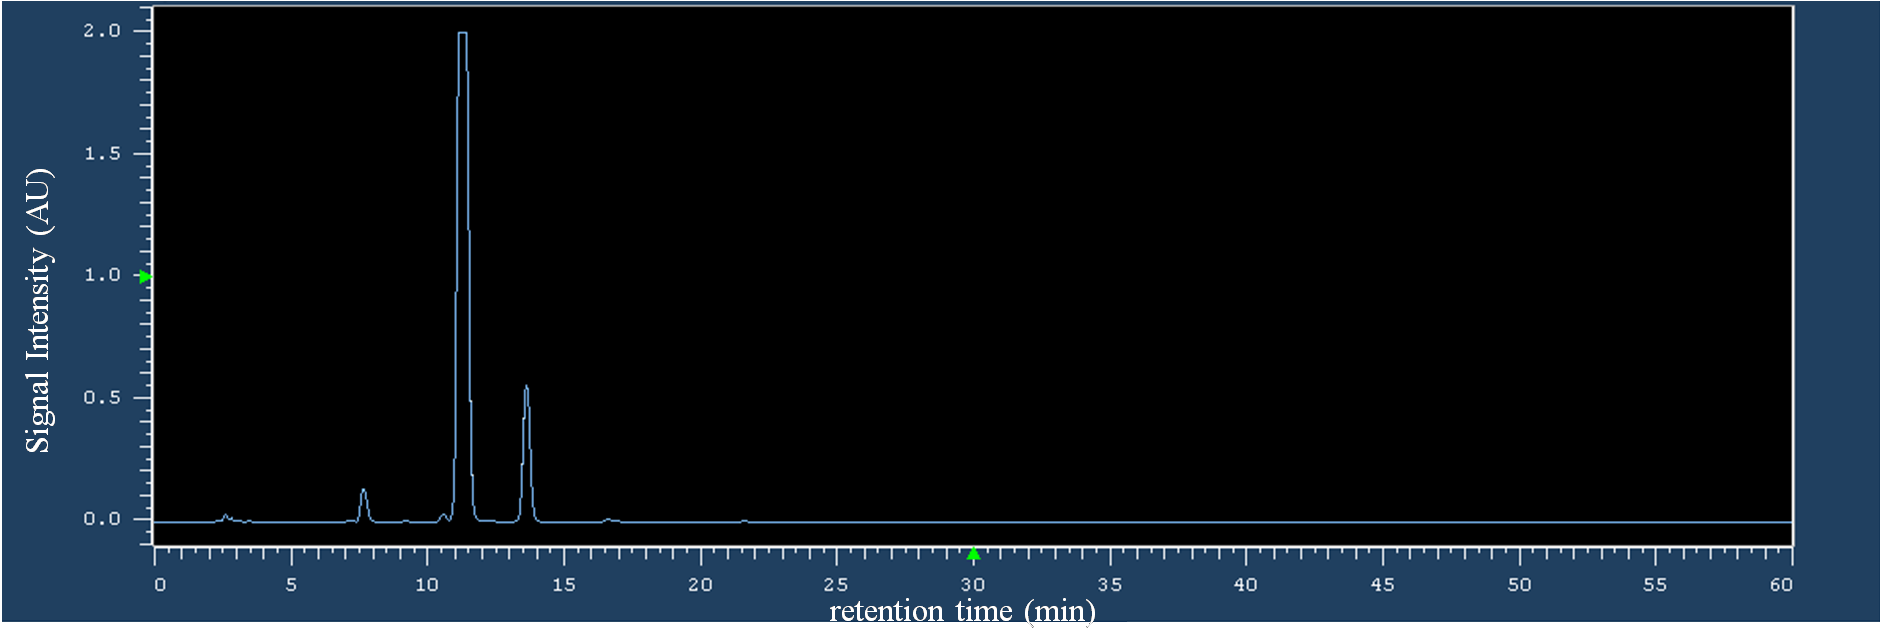 |
| (**b**) |

**Figure S27.** *Cont.*

| 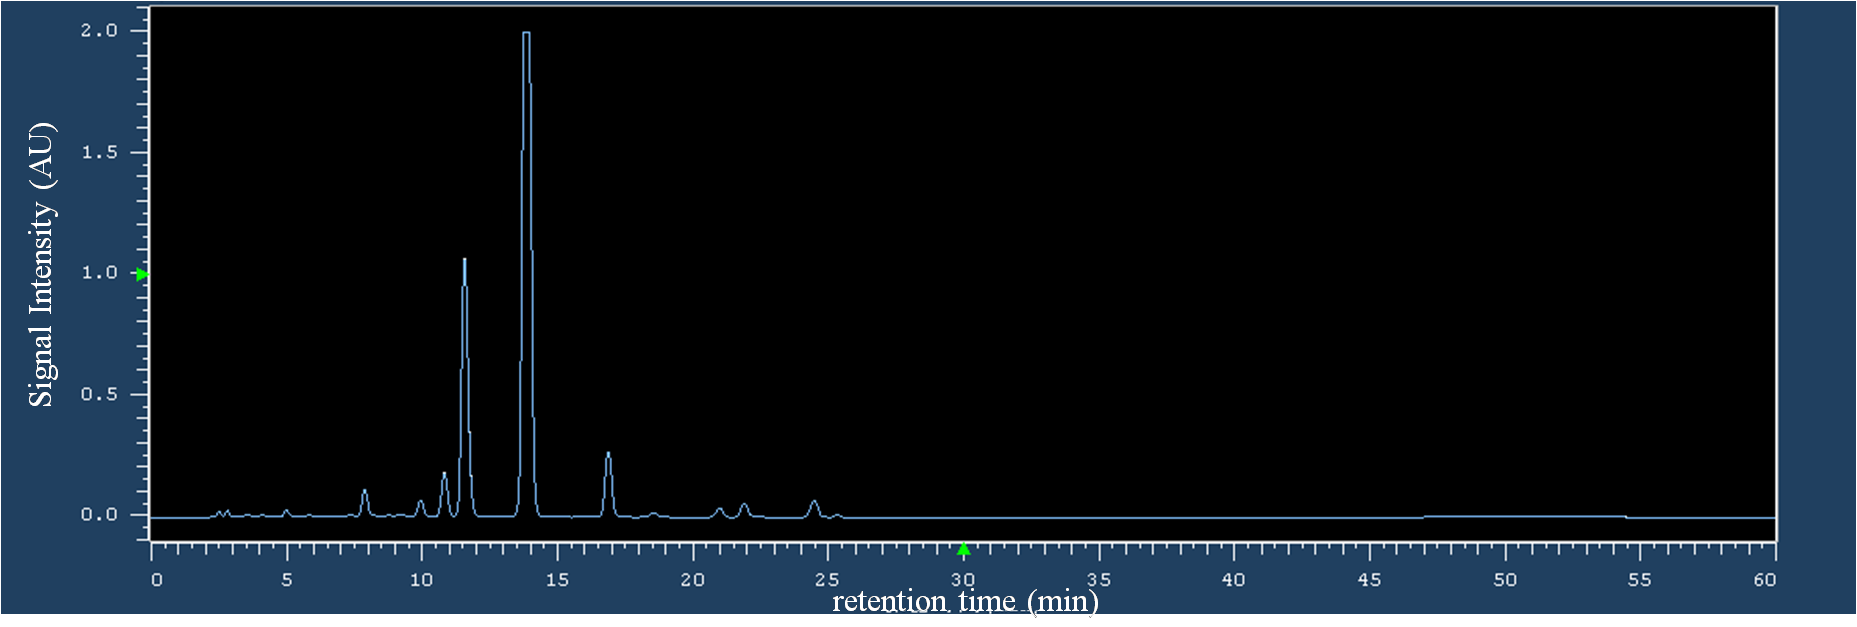 |
| --- |
| (**c**) |
| 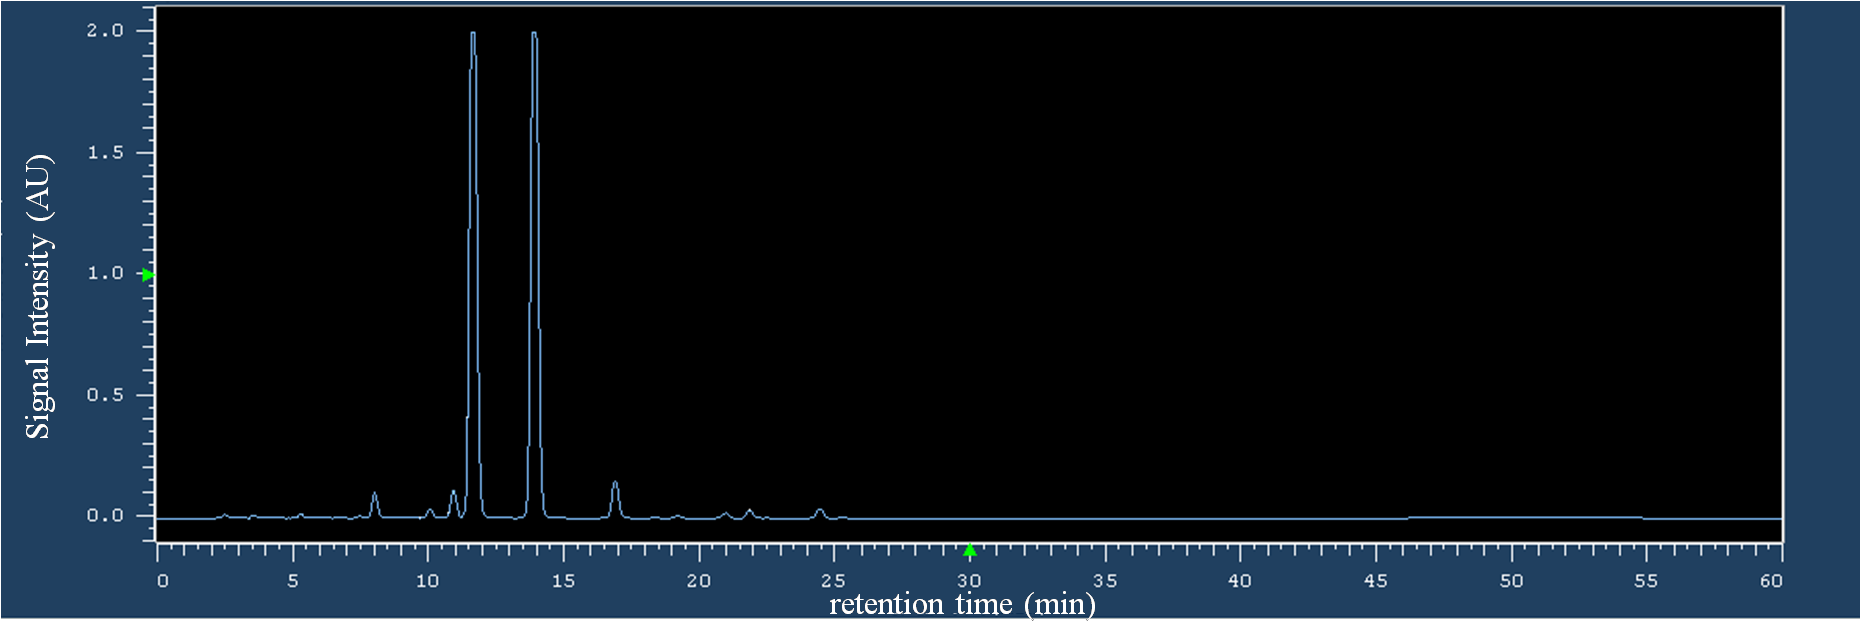 |
| (**d**) |

**Figure S27.** Marfey’s method applying for compound **5** (ODS column: Solvent A: water
+ 0.2% TFA; Solvent B: MeCN; linear gradient: 0 min 25% B, 40 min 60% B, 45 min 100% B; Flow rate: 1 mL/min; Teperature, 30 °C; UV detection at 340 nm; FDAA, 13.6 min).
(**a**) Co-injection of FDAA derivatives of standard D-Ala by ODS column; (**b**) Co-injection of FDAA derivatives of standard L-Ala by ODS column; (**c**) FDAA derivatives of the acid hydrolysate of **5** by ODS column; (**d**) Co-injection of FDAA derivatives of the acid hydrolysate of **5** with standard L-Ala by ODS column.

| 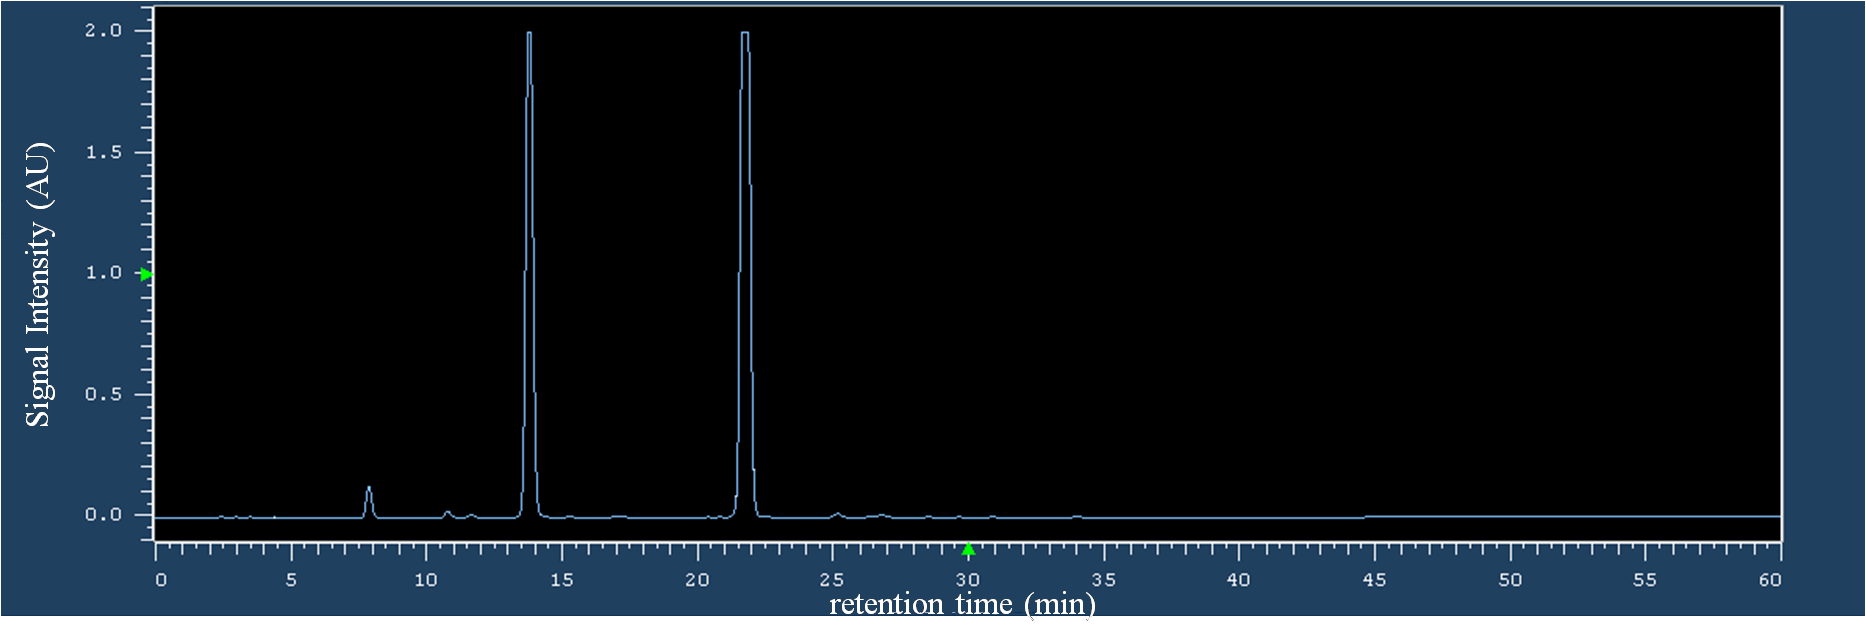 |
| --- |
| (**a**) |

**Figure S28.** *Cont.*

| 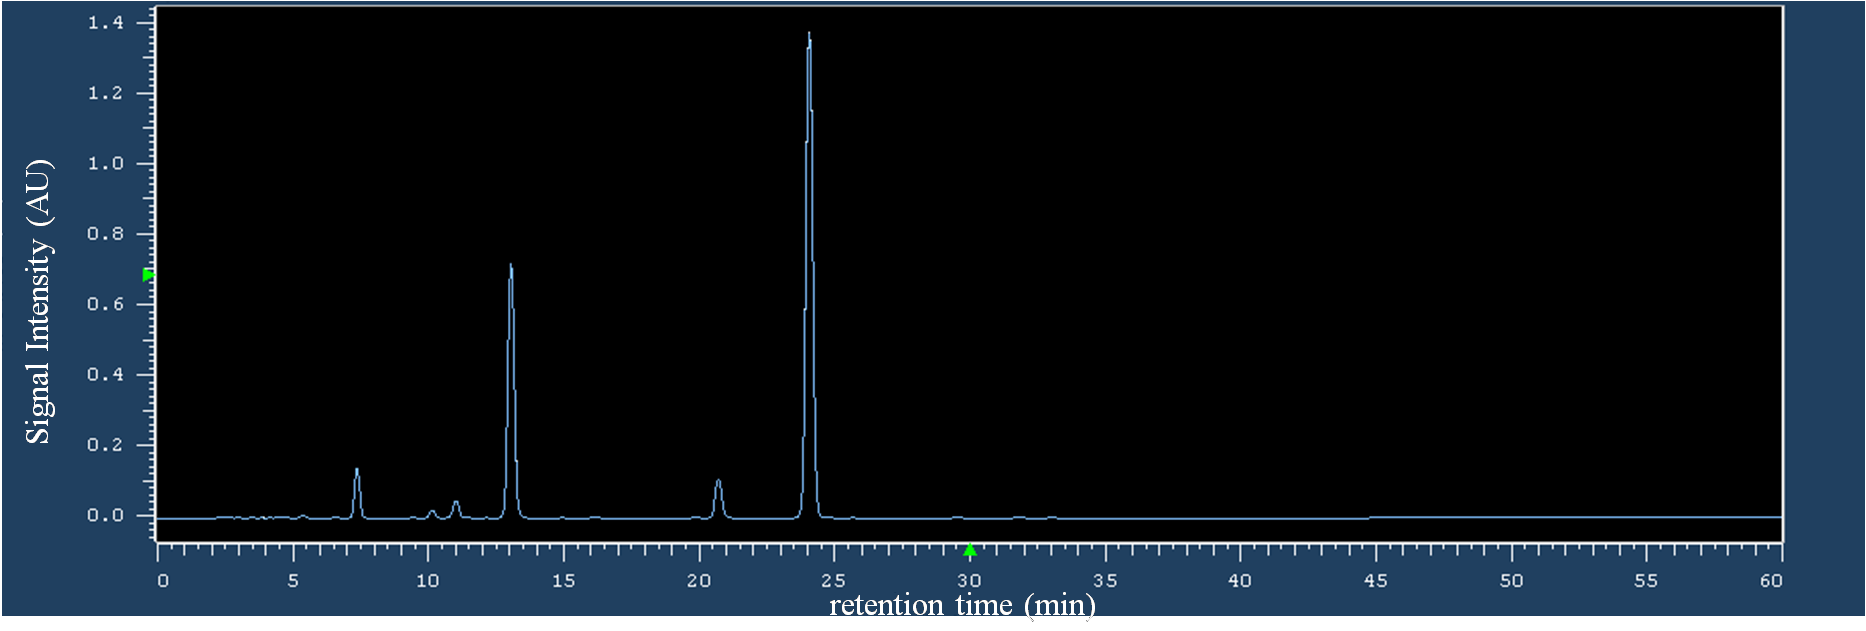 |
| --- |
| (**b**) |
| 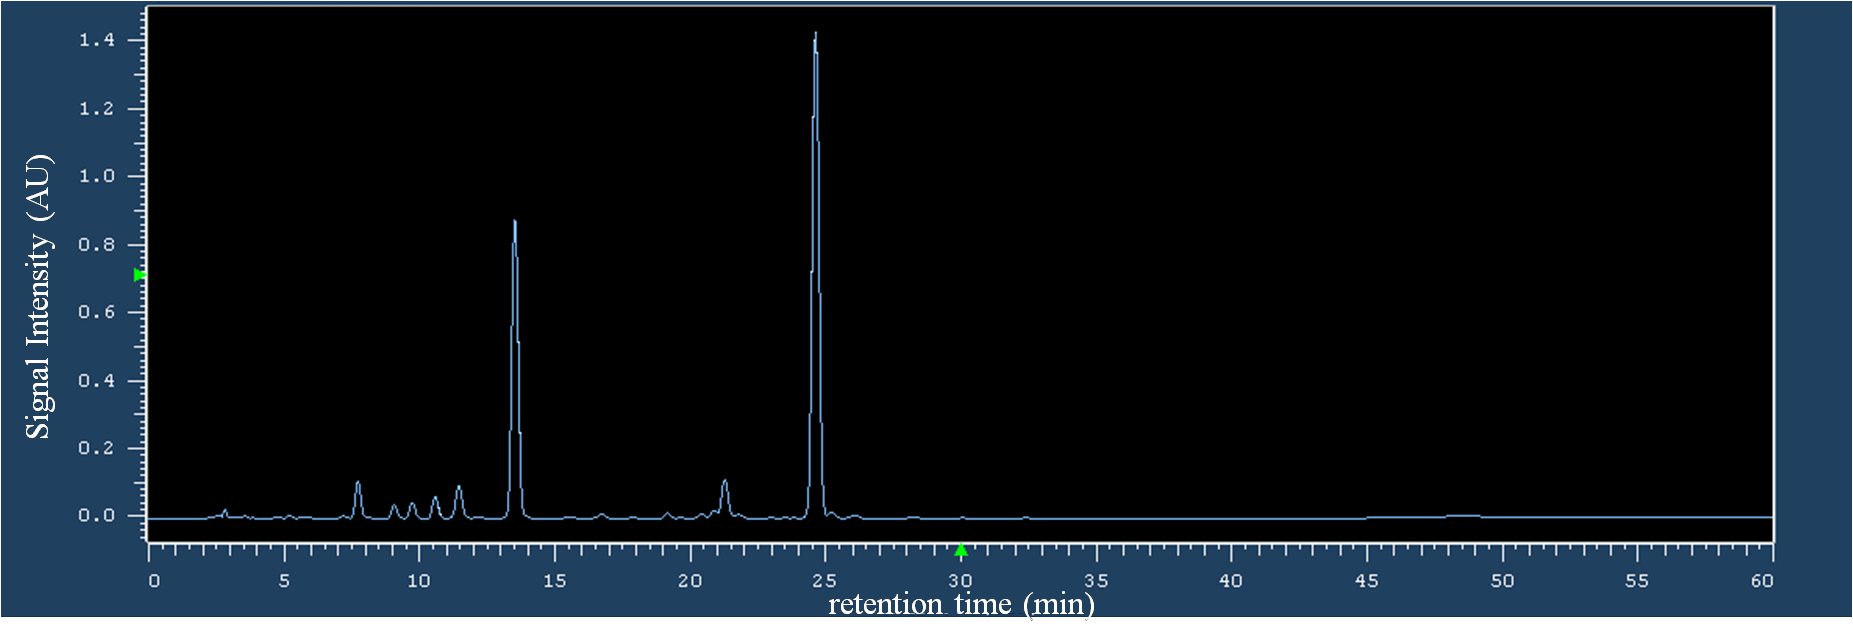 |
| (**c**) |
| 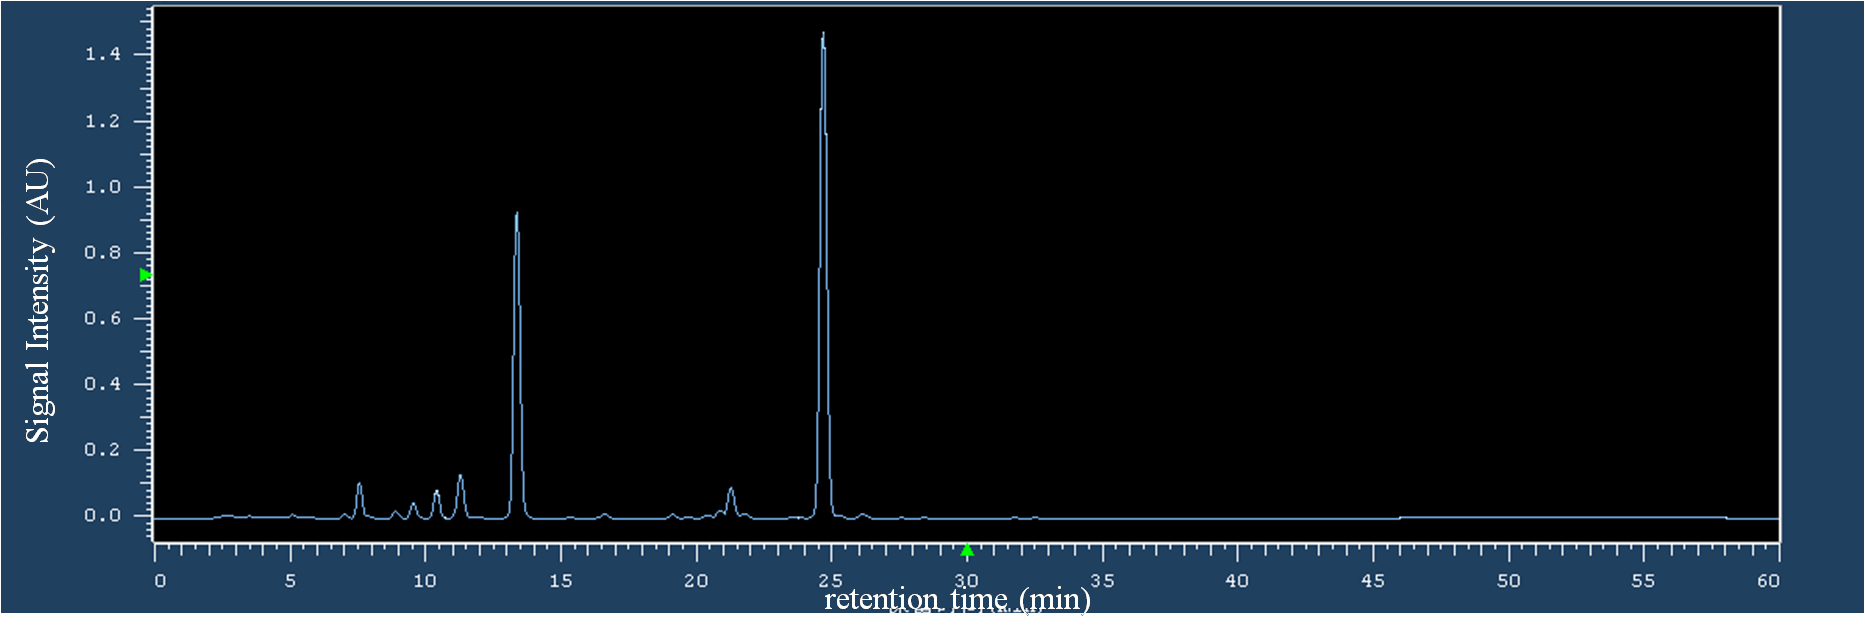 |
| (**d**) |

**Figure S28.** Marfey’s method applying for compound **8** (ODS column: Solvent A: water
+ 0.2% TFA; Solvent B: MeCN; linear gradient: 0 min 25% B, 40 min 60% B, 45 min
100% B; Flow rate: 1 mL/min; Teperature, 30 °C; UV detection at 340 nm; FDAA,
13.6 min). (**a**) Co-injection of FDAA derivatives of standard l-phenylalanine by
ODS column; (**b**) Co-injection of FDAA derivatives of standard d-phenylalanine by
ODS column; (**c**) FDAA derivatives of the acid hydrolysate of **8** by ODS column;
(**d**) Co-injection of FDAA derivatives of the acid hydrolysate of **8** with standard
d-phenylalanine by ODS column.

**Table S1.** 1H (600 MHz) and 13C (150 MHz) NMR data for compounds **2**–**3** in CDCl3.

| **2** | | **3** | |
| --- | --- | --- | --- |
| **δC** | **δH, Mult. (*J* in Hz)** | **δC** | **δH, Mult. (*J* in Hz)** |
| 123.3, CH | 6.68, t (7.6) | 123.4, CH | 6.64, t (7.6) |
| 120.7, CH | 6.69, t (7.7) | 120.5, CH | 6.68, t (7.7) |
| 127.6, CH | 7.00, t (7.6) | 127.4, CH | 7.00, d (7.6) |
| 117.1, CH | 6.71, t (7.6) | 116.9, CH | 6.64, d (7.6) |
| 142.8, C |  | 142.8, C |  |
| 82.6, CH | 4.69, s | 82.4, CH | 4.70, s |
| 51.6, C |  | 51.4, C |  |
| 132.4, C |  | 132.4, C |  |
| 52.1, C |  | 52.2, C |  |
| 132.5, C |  | 132.3, C |  |
| 79.8, CH | 5.02, s | 79.1, CH | 5.11, s |
| 65.5, CH | 4.08, d (9.0) | 65.6, CH | 4.18, d (9.0) |
| 136.9, C |  | 136.6, C |  |
| 113.3, CH | 6.06, d (7.7) | 113.2, CH | 6.08, d (7.6) |
| 129.0, CH | 6.88, t (7.7) | 128.9, CH | 6.88, t (7.7) |
| 102.0, CH | 5.95, d (7.6) | 101.9, CH | 5.94, d (7.7) |
| 150.7, C |  | 150.6, C |  |
| 44.2, CH2 | 3.47, dd (11.6, 8.6);  3.36, dd (11.8, 8.7) | 44.3, CH2 | 3.87, dd (11.9, 8.4);  3.07, dd (11.9, 8.5) |
| 30.9, CH2 | 2.27, dt (13.1, 7.3);  1.97, dd (13.2, 7.2) | 30.5, CH2 | 2.71, dd (13.5, 7.7);  1.99, dd (13.1, 7.3) |
| 38.2, CH2 | 2.74, dt (12.5, 8.3);  2.36, dd (12.8, 8.4) | 37.9, CH2 | 2.36, dt (12.2, 8.5);  2.27, dt (12.7, 8.2) |
| 36.4, CH2 | 3.89, dd (11.5, 8.9);  3.01, dt (11.5, 8.4) | 36.1, CH2 | 3.48, dd (15.8, 8.6);  3.4, dd (15.8, 8.7) |
| 64.2, CH | 2.87, d (9.0) | 64.0, CH | 2.90, d (9.0) |
| 59.9, C |  | 59.8, C |  |
| 20.6, CH3 | 1.38, s | 25.0, CH3 | 1.42, s |
| 24.9, CH3 | 1.53, s | 20.6, CH3 | 1.65, s |
| 29.8, CH3 | 2.84, s | 29.7, CH3 | 2.84, s |
| 172.1, C |  | 168.5, C |  |
| 22.8, CH3 | 2.33, s | 121.4, CH | 6.56, d (15.1) |
|  |  | 141.9, CH | 7.31, dd (15.1, 10.8) |
|  |  | 130.8, CH | 6.19, m |
|  |  | 137.2, CH | 6.10, d (6.7) |
|  |  | 18.8, CH3 | 1.84, d (6.7) |

*Communesin A* (**2**): White amorphous powder; [α] −29 (*c* 0.1, MeOH); UV (MeOH) λmax 206 (3.74), 248 (3.47), 268 (3.17), 316 (2.65) nm; CD (*c* 0.1, MeOH) λmax (Δ*ε*) 218 (−1.4), 244 (+2.0), 270 (−2.2), 294 (+1.8), 319 (−1.0) nm; 1H and 13C NMR data, see Table 1. HRESIMS *m*/*z* 457.2607
[M + H]+ (calcd for C28H33N4O2, 457.2604).

*Communesin B* (**3**): White amorphous powder; [α] −69 (*c* 0.1, MeOH); UV (MeOH) λmax 206 (3.93), 268 (3.85) nm; CD (*c* 0.1, MeOH) λmax (Δ*ε*) 216 (−2.2), 245 (+2.0), 270 (−2.3), 294 (+2.1), 319 (−0.1) nm; 1H and 13C NMR data, see Table 1. HRESIMS *m*/*z* 509.2919 [M + H]+ (calcd for C32H37N4O2, 509.2917).
